# Supplementary material for: Metabolome Response to Glucose in the β-Cell Line INS-1 832/13
Source: PubMed Central journal article supplement (PMC3624472; doi:10.1074/jbc.m112.414961), 2013-02-20
Supplement: supp_M112.414961_jbc.M112.414961-1.pdf [file supp_M112.414961_jbc.M112.414961-1.pdf]

## Supplemental Information for

### Metabolome Response to Glucose in the $\beta$ -cell line INS-1 832/13

Matthew A. Lorenz<sup>1,4</sup>, Mahmoud A. El Azzouny<sup>1,4</sup>, Robert T. Kennedy<sup>1,2</sup> Charles F. Burant<sup>3</sup>

Figure and Table Captions for Supporting Information:

**Supplemental Figure 1.** Results from standard addition experiment to determine linearity of response for 26 metabolites in cell extract matrix. An extract of INS-1 cells that had been incubated for 2 h in 0.5 mM glucose in KRB was divided into aliquots. The aliquots were spiked to create different concentrations of 24 metabolites and a constant final volume of extract. Each sample was analyzed by LC-TOF-MS and peak areas plotted against spiked concentration (i.e., does not incorporate endogenous concentration). Analytes that have a smaller number of points in the lines have high concentrations so low concentration spikes were not used because they had small effects on peak area. Each plot indicates the  $R^2$  value from linear regression analysis.

Supplemental Figure 1.

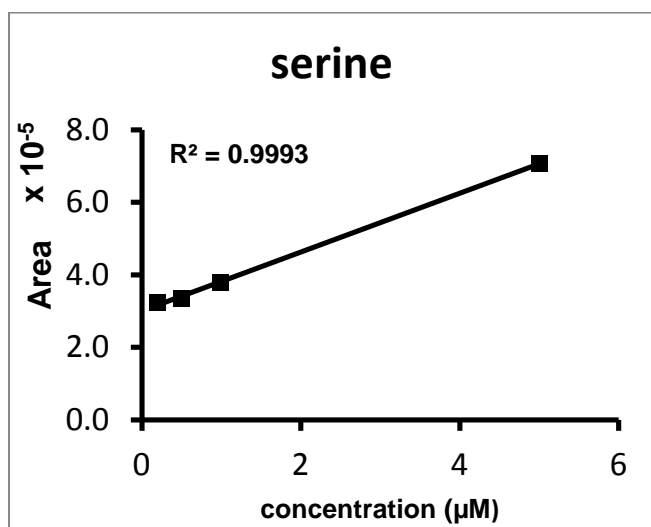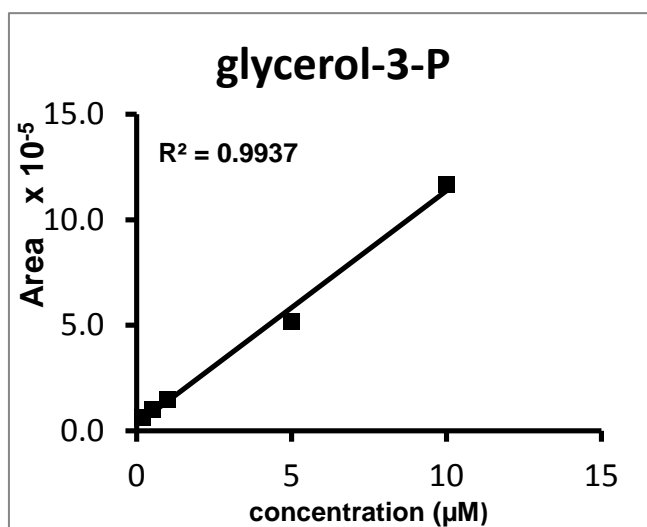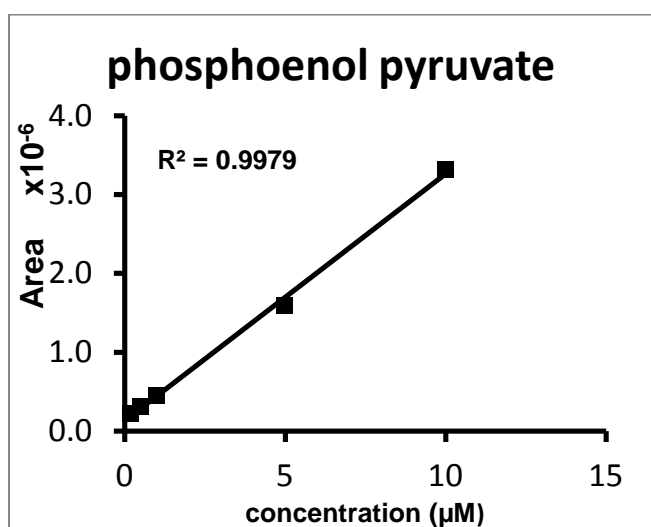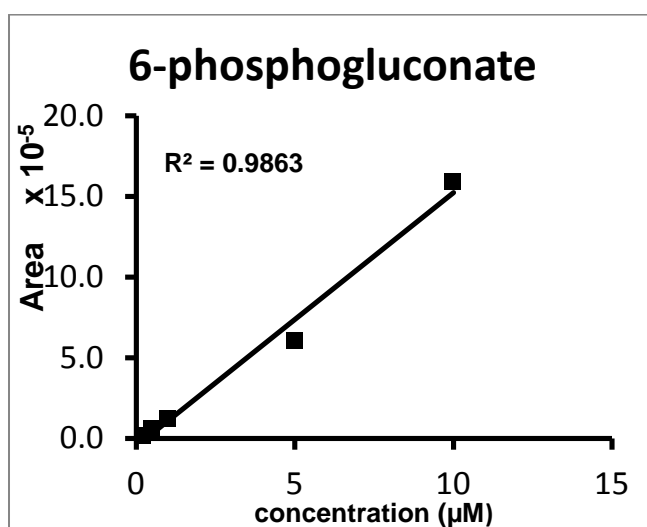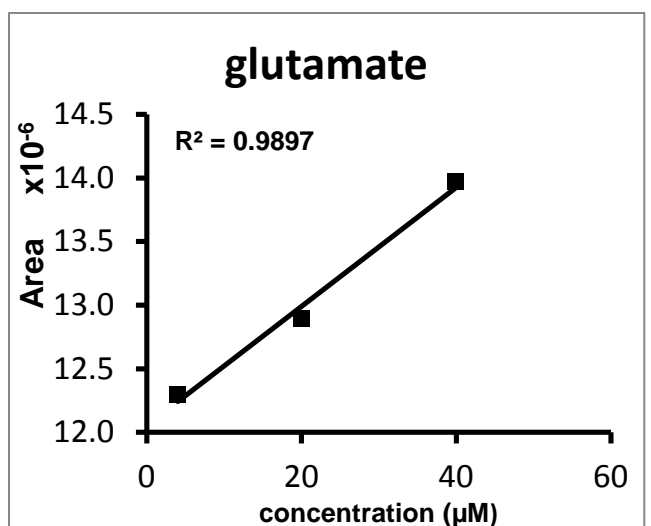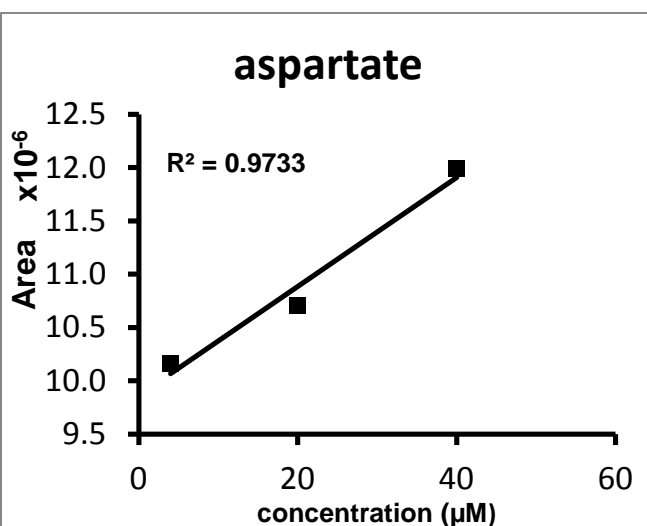

Supplemental Figure 1 (continued).

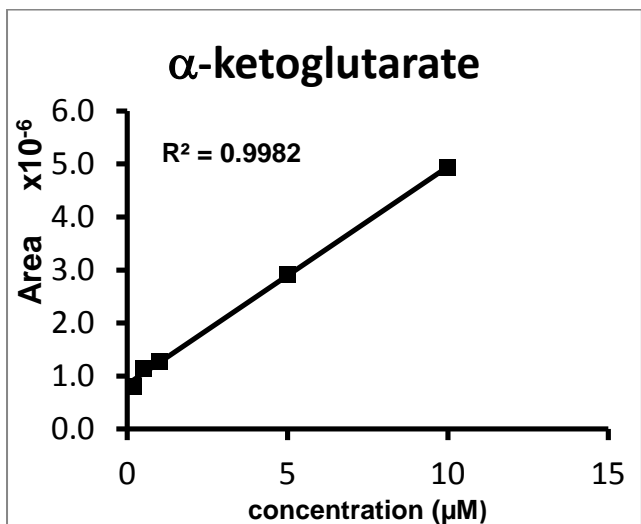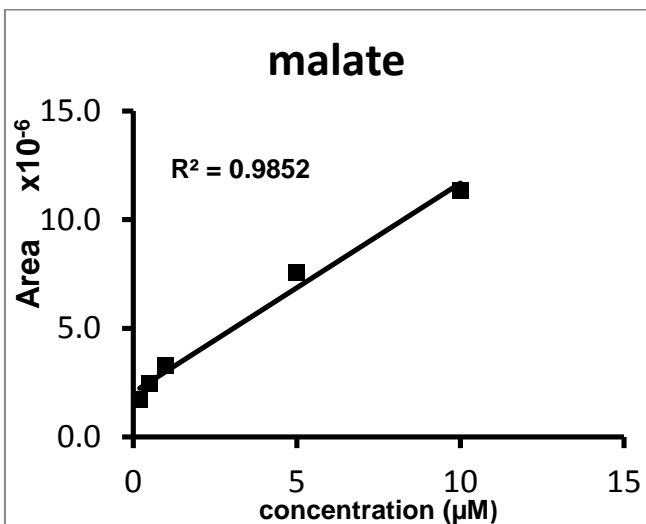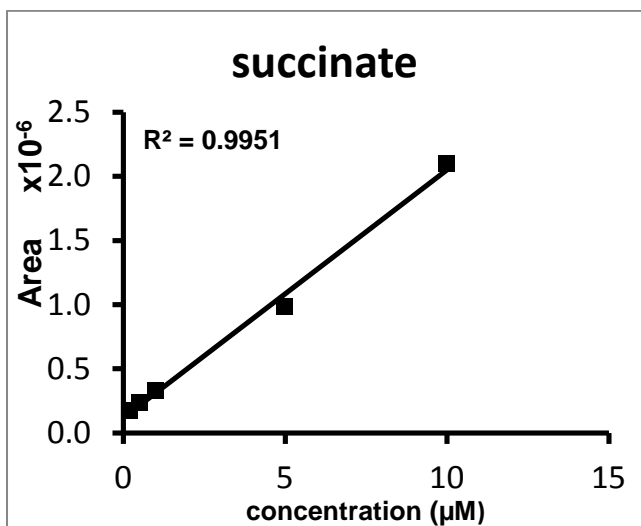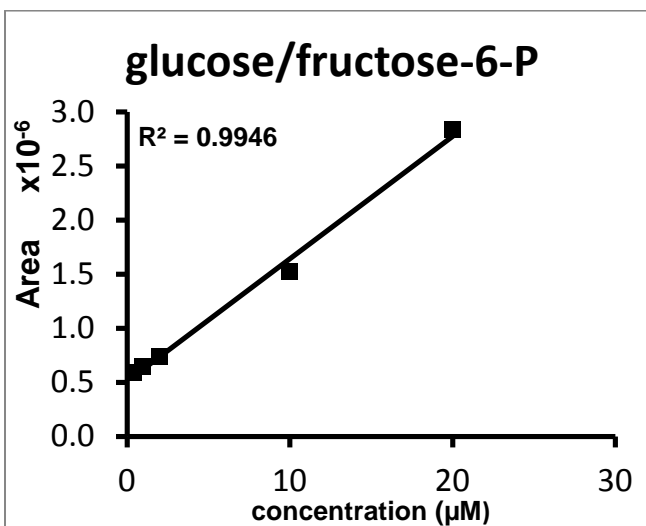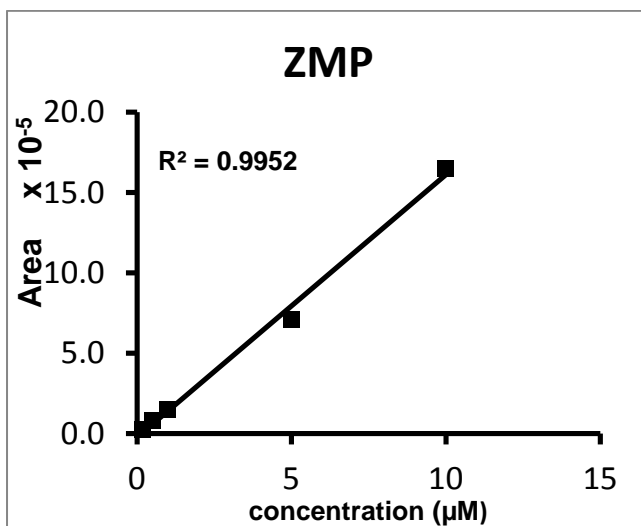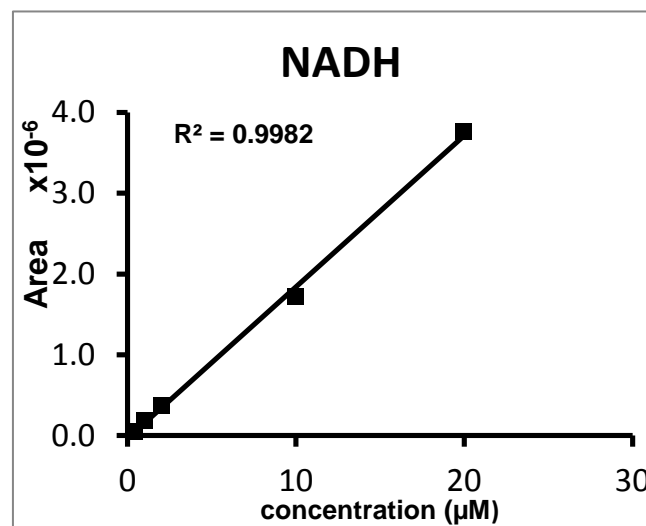

Supplemental Figure 1 (continued).

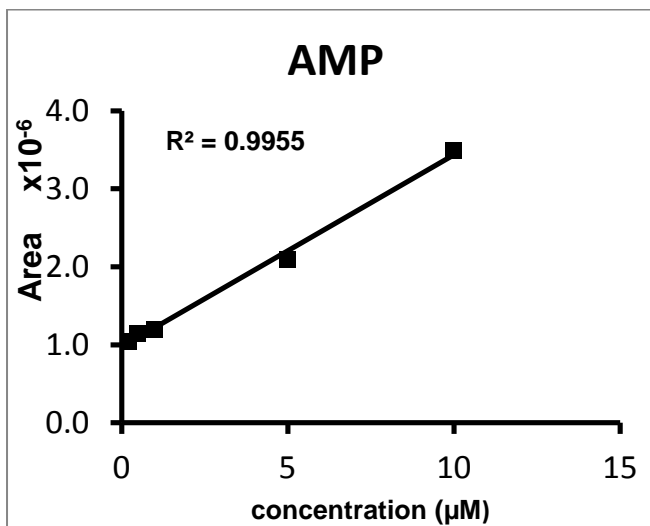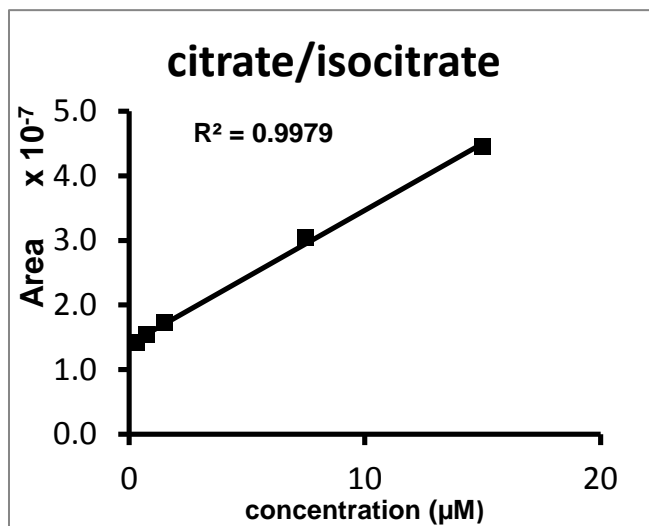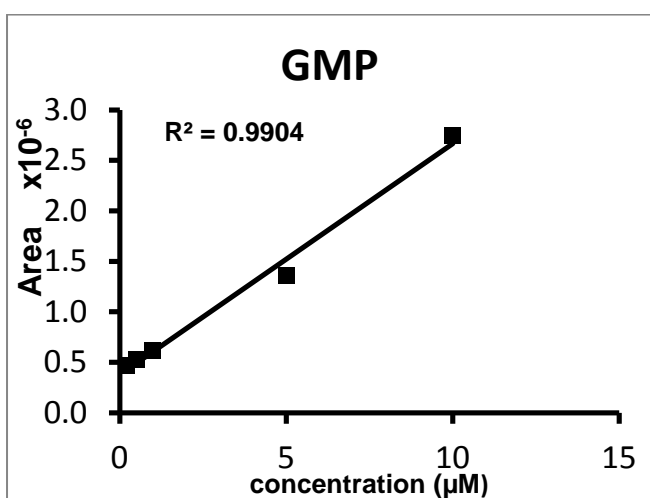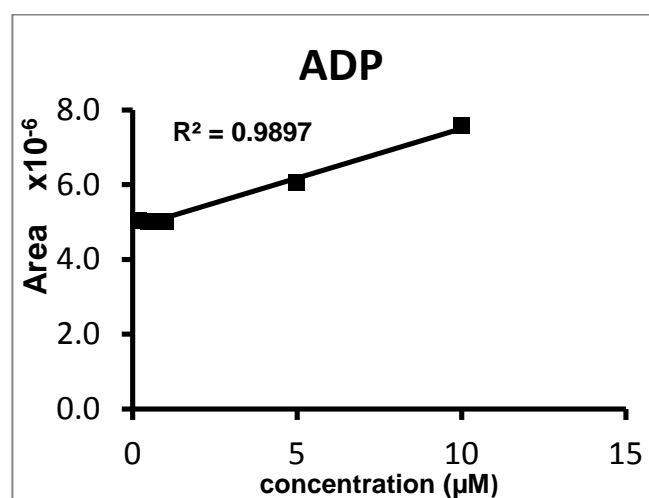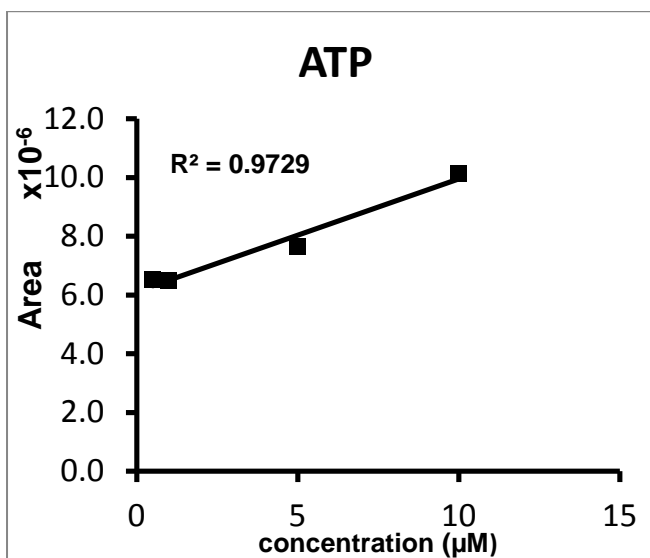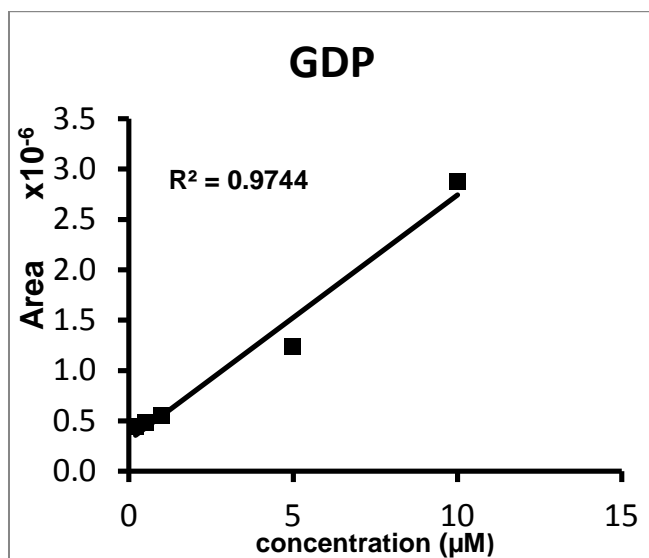

Supplemental Figure 1 (continued).

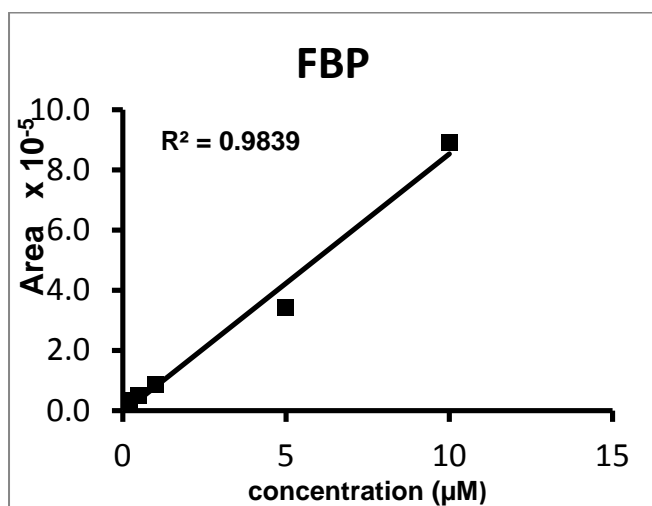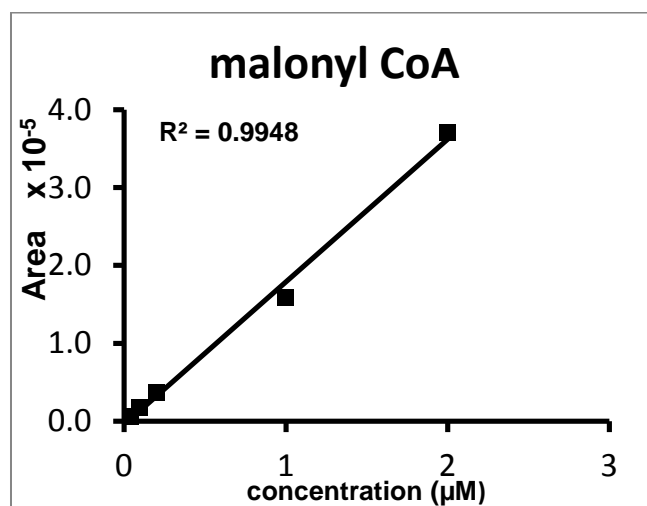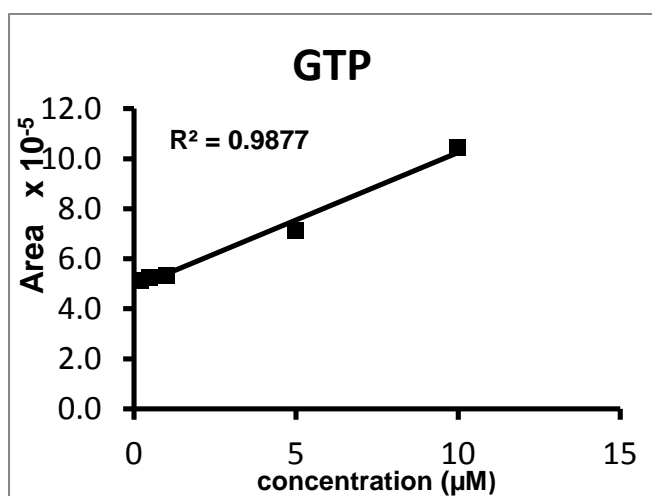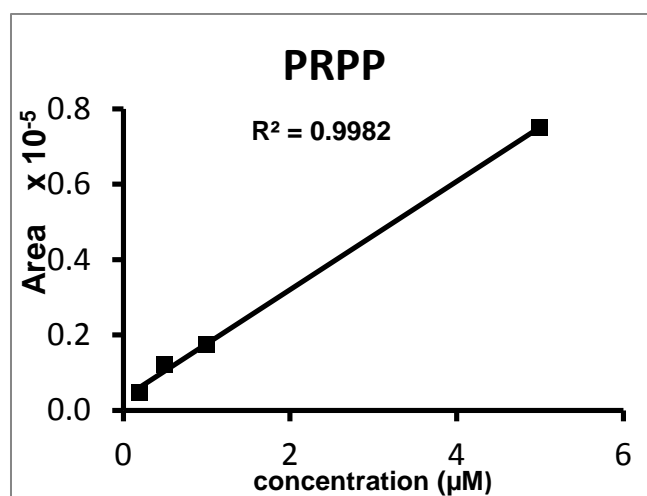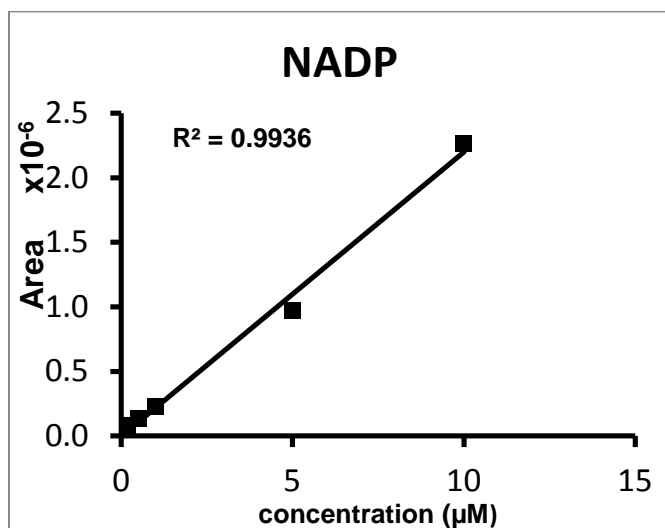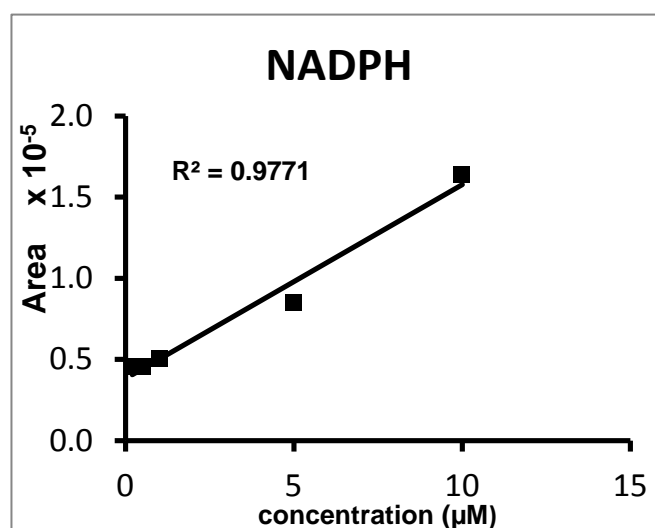

Supplemental Figure 1 (continued).

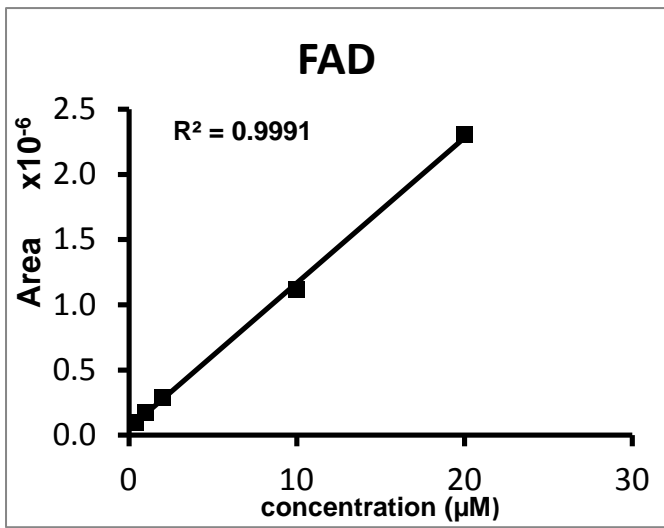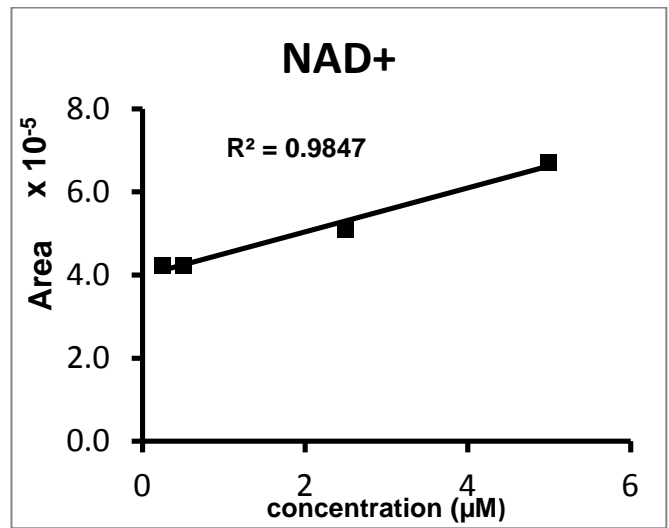

**Supplemental Figure 2. Insulin secretion rate data for INS-1 cells.** (a) Total insulin secreted versus stimulation time (0.5 to 10 mM glucose at time 0) for 3 plates of INS-1 cells (a, b and c). Error bars represent SEM of analytical replicates, n = 2. (b) Insulin secretion rate versus stimulation time. Average secretion rate was calculated as the difference in insulin released between each sampling interval and plotted (blue dash). The average rate during the sampling interval is plotted in red.

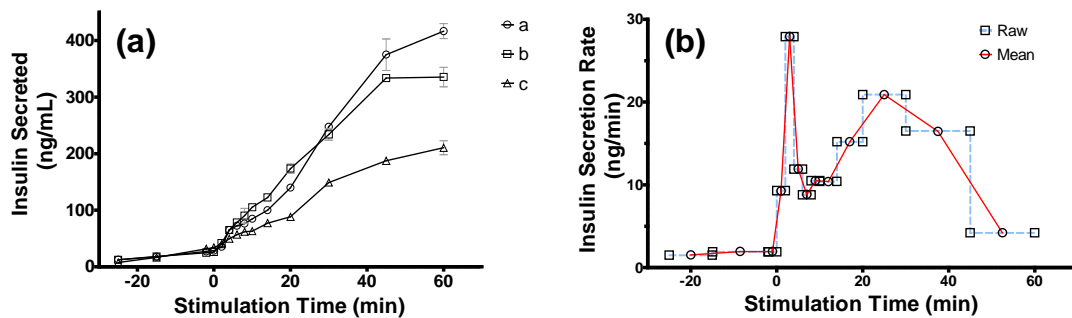

**Supplemental Table 1.** Summary of metabolites identified and quantified by LC-TOF-MS in INS-1 cells. Metabolites were identified by matching the detected mass to the Human Metabolome Database, comparing isotope ratios expected to observed, and by matching retention time with authentic standards where standards were available. Selected metabolites were quantified by the standard addition method to INS-1 extracts to determine their pool size. Authentic standards were added to sample at 3 different concentrations for the standard addition work.



| <b>Table 1.</b>                                      |                     |                                         |                                                                                 |                                           |                           |                        |                                                           |                                                  |
|------------------------------------------------------|---------------------|-----------------------------------------|---------------------------------------------------------------------------------|-------------------------------------------|---------------------------|------------------------|-----------------------------------------------------------|--------------------------------------------------|
| Metabolite                                           | Abbreviation        | Identification (ID) method <sup>1</sup> | Molecular Formula                                                               | <sup>13</sup> C - Internal Standard Used? | Theoretical Mass<br>(amu) | Measured Mass<br>(amu) | Difference between theoretical and measured mass<br>(ppm) | Concentration <sup>2</sup><br>(nmole/mg protein) |
| <b>Glycolysis</b>                                    |                     |                                         |                                                                                 |                                           |                           |                        |                                                           |                                                  |
| hexose-phosphate                                     | HP                  | S                                       | C <sub>6</sub> H <sub>13</sub> O <sub>6</sub> P                                 | Yes                                       | 260.0297                  | 260.0289               | -3.0                                                      | 58                                               |
| fructose 1,6-bisphosphate                            | FBP                 | S                                       | C <sub>6</sub> H <sub>14</sub> O <sub>12</sub> P <sub>2</sub>                   | Yes                                       | 339.9960                  | 339.9956               | -1.1                                                      | 13                                               |
| 2-phosphoglycerate + 3-phosphoglycerate              | 2PG+3PG             | S                                       | C <sub>3</sub> H <sub>7</sub> O <sub>7</sub> P                                  | No                                        | 185.9929                  | 185.9924               | -2.6                                                      | 11                                               |
| phosphoenolpyruvate                                  | PEP                 | S                                       | C <sub>3</sub> H <sub>5</sub> O <sub>6</sub> P                                  | Yes                                       | 167.9824                  | 167.9812               | -7.0                                                      | 2.3                                              |
| acetyl- Coenzyme A                                   | aCoA                | S                                       | C <sub>23</sub> H <sub>39</sub> N <sub>7</sub> O <sub>17</sub> P <sub>3</sub> S | No                                        | 809.1258                  | 809.1242               | -1.9                                                      | 1.6                                              |
| glycerol-3-phosphate                                 | G3P                 | S                                       | C <sub>3</sub> H <sub>9</sub> O <sub>6</sub> P                                  | No                                        | 172.0137                  | 172.0135               | -1.0                                                      | 15                                               |
| lactate                                              | LAC                 | S                                       | C <sub>3</sub> H <sub>6</sub> O <sub>3</sub>                                    | No                                        | 90.0317                   | 90.0315                | -2.0                                                      | 41                                               |
| <b>Tricarboxylic Acid Cycle</b>                      |                     |                                         |                                                                                 |                                           |                           |                        |                                                           |                                                  |
| citrate+isocitrate                                   | CIT+ICIT            | S                                       | C <sub>6</sub> H <sub>8</sub> O <sub>7</sub>                                    | Yes                                       | 192.0270                  | 192.0262               | -4.1                                                      | 110                                              |
| alpha-ketoglutarate                                  | AKG                 | S                                       | C <sub>6</sub> H <sub>8</sub> O <sub>5</sub>                                    | Yes                                       | 146.0215                  | 146.0207               | -5.3                                                      | 22                                               |
| succinyl-coa                                         | sCoA                | S                                       | C <sub>25</sub> H <sub>40</sub> N <sub>7</sub> O <sub>19</sub> P <sub>3</sub> S | No                                        | 867.1312                  | 867.1294               | -2.0                                                      | 0.85                                             |
| succinate                                            | SUC                 | S                                       | C <sub>4</sub> H <sub>6</sub> O <sub>4</sub>                                    | Yes                                       | 118.0266                  | 118.0275               | 7.8                                                       | 22                                               |
| malate                                               | MAL                 | S                                       | C <sub>4</sub> H <sub>6</sub> O <sub>5</sub>                                    | No                                        | 134.0215                  | 134.0211               | -2.8                                                      | 67                                               |
| malonyl- Coenzyme A                                  | mCoA                | S                                       | C <sub>24</sub> H <sub>38</sub> N <sub>7</sub> O <sub>19</sub> P <sub>3</sub> S | No                                        | 853.1156                  | 809.1208               | -6.1                                                      | 0.86                                             |
| aspartic acid                                        | Asp                 | S                                       | C <sub>4</sub> H <sub>7</sub> NO <sub>4</sub>                                   | No                                        | 133.0375                  | 133.0372               | -2.1                                                      | 750                                              |
| glutamic acid                                        | Glu                 | S                                       | C <sub>5</sub> H <sub>9</sub> NO <sub>4</sub>                                   | No                                        | 147.0532                  | 147.0528               | -2.6                                                      | 2500                                             |
| <b>Pentose phosphate pathway</b>                     |                     |                                         |                                                                                 |                                           |                           |                        |                                                           |                                                  |
| ribose phosphate                                     | R5P                 | S                                       | C <sub>5</sub> H <sub>11</sub> O <sub>6</sub> P                                 | No                                        | 230.0191                  | 230.0183               | -3.4                                                      | 3.4                                              |
| 6-phosphogluconic acid                               | 6PG                 | S                                       | C <sub>6</sub> H <sub>13</sub> O <sub>10</sub> P                                | No                                        | 276.0246                  | 276.0242               | -1.4                                                      | 2.7                                              |
| sedoheptulose-7-phosphate                            | S7P                 | S                                       | C <sub>7</sub> H <sub>15</sub> O <sub>10</sub> P                                | No                                        | 290.0403                  | 290.0405               | 0.8                                                       | 12                                               |
| phosphoribosyl pyrophosphate                         | PRPP                | S                                       | C <sub>8</sub> H <sub>13</sub> O <sub>14</sub> P <sub>3</sub>                   | No                                        | 389.9518                  | 389.9505               | -3.3                                                      | 3.5                                              |
| <b>Nucleotides</b>                                   |                     |                                         |                                                                                 |                                           |                           |                        |                                                           |                                                  |
| adenosine monophosphate                              | AMP                 | S                                       | C <sub>10</sub> H <sub>14</sub> N <sub>5</sub> O <sub>7</sub> P                 | Yes                                       | 347.0631                  | 347.0620               | -3.1                                                      | 11                                               |
| adenosine diphosphate                                | ADP                 | S                                       | C <sub>10</sub> H <sub>15</sub> N <sub>5</sub> O <sub>10</sub> P <sub>2</sub>   | No                                        | 427.0294                  | 427.0282               | -2.8                                                      | 18                                               |
| adenosine triphosphate                               | ATP                 | S                                       | C <sub>10</sub> H <sub>16</sub> N <sub>5</sub> O <sub>13</sub> P <sub>3</sub>   | Yes                                       | 506.9957                  | 506.9949               | -1.5                                                      | 850                                              |
| guanosine monophosphate                              | GMP                 | S                                       | C <sub>10</sub> H <sub>14</sub> N <sub>6</sub> O <sub>8</sub> P                 | No                                        | 363.0580                  | 363.0577               | -0.8                                                      | 2.8                                              |
| guanosine diphosphate                                | GDP                 | S                                       | C <sub>10</sub> H <sub>15</sub> N <sub>6</sub> O <sub>11</sub> P <sub>2</sub>   | No                                        | 443.0243                  | 443.0245               | 0.5                                                       | 4.5                                              |
| guanosine triphosphate                               | GTP                 | S                                       | C <sub>10</sub> H <sub>16</sub> N <sub>6</sub> O <sub>14</sub> P <sub>3</sub>   | Yes                                       | 522.9907                  | 522.9900               | -1.3                                                      | 3.9                                              |
| uridine monophosphate                                | UMP                 | S                                       | C <sub>9</sub> H <sub>13</sub> N <sub>2</sub> O <sub>8</sub> P                  | No                                        | 324.0359                  | 324.0350               | -2.7                                                      | na                                               |
| uridine diphosphate                                  | UDP                 | S                                       | C <sub>9</sub> H <sub>14</sub> N <sub>2</sub> O <sub>12</sub> P <sub>2</sub>    | No                                        | 404.0022                  | 404.0020               | -0.4                                                      | na                                               |
| uridine triphosphate                                 | UTP                 | S                                       | C <sub>9</sub> H <sub>15</sub> N <sub>2</sub> O <sub>15</sub> P <sub>3</sub>    | No                                        | 483.9685                  | 483.9679               | -1.2                                                      | na                                               |
| cytidine monophosphate                               | CMP                 | S                                       | C <sub>9</sub> H <sub>14</sub> N <sub>3</sub> O <sub>8</sub> P                  | No                                        | 323.0518                  | 323.0502               | -4.9                                                      | na                                               |
| cytidine diphosphate                                 | CDP                 | S                                       | C <sub>9</sub> H <sub>15</sub> N <sub>3</sub> O <sub>11</sub> P <sub>2</sub>    | No                                        | 403.0182                  | 403.0178               | -0.9                                                      | na                                               |
| cytidine triphosphate                                | CTP                 | S                                       | C <sub>9</sub> H <sub>16</sub> N <sub>3</sub> O <sub>14</sub> P <sub>3</sub>    | No                                        | 482.9845                  | 482.9833               | -2.4                                                      | na                                               |
| nicotinamide adenine dinucleotide                    | NAD                 | S                                       | C <sub>21</sub> H <sub>27</sub> N <sub>7</sub> O <sub>14</sub> P <sub>2</sub>   | No                                        | 663.1091                  | 663.1089               | -0.3                                                      | 37                                               |
| nicotinamide adenine dinucleotide, reduced           | NADH                | S                                       | C <sub>21</sub> H <sub>29</sub> N <sub>7</sub> O <sub>14</sub> P <sub>2</sub>   | No                                        | 665.1242                  | 665.1240               | -0.3                                                      | 2.0                                              |
| nicotinamide adenine dinucleotide phosphate          | NADP                | S                                       | C <sub>21</sub> H <sub>28</sub> N <sub>7</sub> O <sub>17</sub> P <sub>3</sub>   | No                                        | 743.0755                  | 743.0710               | -6.0                                                      | 0.92                                             |
| nicotinamide adenine dinucleotide phosphate, reduced | NADPH               | S                                       | C <sub>21</sub> H <sub>29</sub> N <sub>7</sub> O <sub>17</sub> P <sub>3</sub>   | No                                        | 745.0911                  | 745.0925               | 1.9                                                       | 4.0                                              |
| flavin adenine dinucleotide                          | FAD                 | S                                       | C <sub>27</sub> H <sub>33</sub> N <sub>9</sub> O <sub>15</sub> P <sub>2</sub>   | No                                        | 785.1571                  | 785.1565               | -0.7                                                      | 2.6                                              |
| <b>Amino Acids</b>                                   |                     |                                         |                                                                                 |                                           |                           |                        |                                                           |                                                  |
| asparagine                                           | Asn                 | S                                       | C <sub>4</sub> H <sub>8</sub> N <sub>2</sub> O <sub>3</sub>                     | No                                        | 132.0535                  | 132.0531               | -2.9                                                      | 39                                               |
| glutamine                                            | Gln                 | S                                       | C <sub>6</sub> H <sub>10</sub> N <sub>2</sub> O <sub>3</sub>                    | No                                        | 146.0691                  | 146.0687               | -2.6                                                      | 76                                               |
| lysine                                               | Lys                 | S                                       | C <sub>6</sub> H <sub>14</sub> N <sub>2</sub> O <sub>2</sub>                    | No                                        | 146.1055                  | 146.1050               | -3.3                                                      | 15                                               |
| ornithine                                            | Orn                 | S                                       | C <sub>5</sub> H <sub>12</sub> N <sub>2</sub> O <sub>2</sub>                    | No                                        | 132.0899                  | 132.0895               | -2.9                                                      | 22                                               |
| serine                                               | Ser                 | S                                       | C <sub>3</sub> H <sub>7</sub> NO <sub>3</sub>                                   | No                                        | 105.0426                  | 105.0421               | -4.6                                                      | 25                                               |
| <b>Long Chain CoAs</b>                               |                     |                                         |                                                                                 |                                           |                           |                        |                                                           |                                                  |
| 14:0 Conenzyme A                                     | 14:0-CoA            | D                                       | C <sub>35</sub> H <sub>62</sub> N <sub>7</sub> O <sub>17</sub> P <sub>3</sub> S | No                                        | 977.3135                  | 977.3108               | -2.7                                                      | na                                               |
| 16:0 Conenzyme A                                     | 16:0-CoA            | S                                       | C <sub>37</sub> H <sub>66</sub> N <sub>7</sub> O <sub>17</sub> P <sub>3</sub> S | No                                        | 1005.3448                 | 1005.3450              | 0.2                                                       | 0.46                                             |
| 16:1 Conenzyme A                                     | 16:1-CoA            | D                                       | C <sub>37</sub> H <sub>64</sub> N <sub>7</sub> O <sub>17</sub> P <sub>3</sub> S | No                                        | 1003.3384                 | 1003.3280              | -10.3                                                     | na                                               |
| 18:0 Conenzyme A                                     | 18:0-CoA            | D                                       | C <sub>39</sub> H <sub>70</sub> N <sub>7</sub> O <sub>17</sub> P <sub>3</sub> S | No                                        | 1033.3761                 | 1033.3688              | -7.0                                                      | na                                               |
| 18:1 Conenzyme A                                     | 18:1-CoA            | D                                       | C <sub>39</sub> H <sub>68</sub> N <sub>7</sub> O <sub>17</sub> P <sub>3</sub> S | No                                        | 1031.3605                 | 1031.3590              | -1.4                                                      | na                                               |
| <b>Sugar Nucleotide Donors</b>                       |                     |                                         |                                                                                 |                                           |                           |                        |                                                           |                                                  |
| GDP- mannose                                         | GDP-M               | S                                       | C <sub>16</sub> H <sub>25</sub> N <sub>6</sub> O <sub>16</sub> P <sub>2</sub>   | No                                        | 605.0771                  | 605.0780               | 1.5                                                       | 4.2                                              |
| UDP-d-galacturonate                                  | UDP-GA              | D                                       | C <sub>15</sub> H <sub>22</sub> N <sub>2</sub> O <sub>18</sub> P <sub>2</sub>   | No                                        | 580.0343                  | 580.0334               | -1.5                                                      | na                                               |
| GDP-fucose                                           | GDP-F               | D                                       | C <sub>16</sub> H <sub>25</sub> N <sub>6</sub> O <sub>15</sub> P <sub>2</sub>   | No                                        | 589.0822                  | 589.0827               | 0.9                                                       | na                                               |
| UDP-GlcNAc+ GalNAc                                   | UDP-GlcNAc + GalNAc | D                                       | C <sub>17</sub> H <sub>27</sub> N <sub>3</sub> O <sub>17</sub> P <sub>2</sub>   | No                                        | 607.0816                  | 607.0814               | -0.3                                                      | na                                               |
| UDP-xylose                                           | UDP-X               | D                                       | C <sub>14</sub> H <sub>22</sub> N <sub>2</sub> O <sub>16</sub> P <sub>2</sub>   | No                                        | 536.0444                  | 536.0408               | -6.7                                                      | na                                               |
| UDP-glucose + UDP-galactose                          | UPD-Glc + UDP-Gal   | S                                       | C <sub>15</sub> H <sub>24</sub> N <sub>2</sub> O <sub>17</sub> P <sub>2</sub>   | No                                        | 566.0550                  | 566.0528               | -3.9                                                      | 7.3                                              |
| <b>Miscellaneous</b>                                 |                     |                                         |                                                                                 |                                           |                           |                        |                                                           |                                                  |
| aminoimidazole carboxamide ribonucleotide            | ZMP                 | S                                       | C <sub>9</sub> H <sub>15</sub> N <sub>4</sub> O <sub>8</sub> P                  | No                                        | 338.0627                  | 338.0614               | -3.8                                                      | 4                                                |
| glycineamideribotide                                 | GAR                 | D                                       | C <sub>7</sub> H <sub>15</sub> N <sub>2</sub> O <sub>8</sub> P <sub>1</sub>     | No                                        | 286.0566                  | 286.0577               | 3.9                                                       | na                                               |
| phosphocreatine                                      | PCRE                | S                                       | C <sub>4</sub> H <sub>10</sub> N <sub>3</sub> O <sub>5</sub> P                  | No                                        | 211.0358                  | 211.0351               | -3.2                                                      | 120                                              |
| creatine                                             | CRE                 | S                                       | C <sub>4</sub> H <sub>9</sub> N <sub>3</sub> O <sub>2</sub>                     | No                                        | 131.0695                  | 131.0703               | 6.3                                                       | 8.4                                              |
| phosphate                                            | PO4                 | S                                       | H <sub>4</sub> O <sub>4</sub> P                                                 | No                                        | 97.9769                   | 97.9772                | 3.4                                                       | 383                                              |
| pantothenic acid                                     | PAN                 | S                                       | C <sub>9</sub> H <sub>17</sub> NO <sub>5</sub>                                  | No                                        | 219.1107                  | 219.1120               | 6.0                                                       | 0.035                                            |
| 2-o-(6-phospho-alpha-mannosyl)-d-glycerate           | PMG                 | D                                       | C <sub>9</sub> H <sub>17</sub> O <sub>12</sub> P <sub>1</sub>                   | No                                        | 348.0458                  | 348.0432               | -7.4                                                      | na                                               |
| cytidine diphosphate- ethanolamine                   | CDP-EA              | D                                       | C <sub>11</sub> H <sub>20</sub> N <sub>4</sub> O <sub>11</sub> P <sub>2</sub>   | No                                        | 446.0604                  | 446.0594               | -2.2                                                      | na                                               |
| beta-aspartylglycine                                 | DG                  | D                                       | C <sub>6</sub> H <sub>10</sub> N <sub>2</sub> O <sub>5</sub>                    | No                                        | 190.0590                  | 190.0594               | 2.2                                                       | na                                               |
| citicoline                                           | CC                  | D                                       | C <sub>14</sub> H <sub>28</sub> N <sub>4</sub> O <sub>11</sub> P <sub>2</sub>   | No                                        | 488.1073                  | 488.1060               | -2.6                                                      | na                                               |
| farnesyl pyrophosphate                               | FPP                 | D                                       | C <sub>15</sub> H <sub>28</sub> O <sub>7</sub> P <sub>2</sub>                   | No                                        | 382.1310                  | 382.1296               | -3.6                                                      | na                                               |
| L-beta-aspartyl-L-alanine or 5-L-Glutamylglycine     | DA or EG            | D                                       | C <sub>7</sub> H <sub>12</sub> N <sub>2</sub> O <sub>5</sub>                    | No                                        | 204.0746                  | 204.0748               | 1.1                                                       | na                                               |
| glycerylphosphorylethanolamine                       | GPEA                | D                                       | C <sub>6</sub> H <sub>14</sub> NO <sub>6</sub> P                                | No                                        | 215.0559                  | 215.0551               | -3.6                                                      | na                                               |
| Hexol phosphates                                     | MP                  | D                                       | C <sub>6</sub> H <sub>15</sub> O <sub>9</sub> P                                 | No                                        | 262.0454                  | 262.0443               | -4.1                                                      | na                                               |
| HMG-CoA                                              | HMG-CoA             | S                                       | C <sub>27</sub> H <sub>44</sub> N <sub>7</sub> O <sub>20</sub> P <sub>3</sub> S | No                                        | 911.15744                 | 911.1548               | -2.9                                                      | na                                               |
| <b>Free Fatty Acids</b>                              |                     |                                         |                                                                                 |                                           |                           |                        |                                                           |                                                  |
| 16:0                                                 | 16:0                | S                                       | C <sub>16</sub> H <sub>32</sub> O <sub>2</sub>                                  | No                                        | 256.2402                  | 256.2396               | -2.3                                                      | na                                               |
| 18:0                                                 | 18:0                | S                                       | C <sub>18</sub> H <sub>36</sub> O <sub>2</sub>                                  | No                                        | 284.2715                  | 284.2712               | -1.0                                                      | na                                               |
| 18:1                                                 | 18:1                | S                                       | C <sub>18</sub> H <sub>34</sub> O <sub>2</sub>                                  | No                                        | 282.2559                  | 282.2554               | -1.7                                                      | na                                               |
| 18:2                                                 | 18:2                | D                                       | C <sub>18</sub> H <sub>32</sub> O <sub>2</sub>                                  | No                                        | 280.2402                  | 280.2398               | -1.4                                                      | na                                               |
| 20:0                                                 | 20:0                | S                                       | C <sub>20</sub> H <sub>40</sub> O <sub>2</sub>                                  | No                                        | 312.3028                  | 312.3011               | -5.4                                                      | na                                               |
| 20:1                                                 | 20:1                | D                                       | C <sub>20</sub> H <sub>38</sub> O <sub>2</sub>                                  | No                                        | 310.2872                  | 310.2872               | 0.1                                                       | na                                               |
| 20:2                                                 | 20:2                | D                                       | C <sub>20</sub> H <sub>36</sub> O <sub>2</sub>                                  | No                                        | 308.2715                  | 308.2711               | -1.2                                                      | na                                               |
| 22:0                                                 | 22:0                | S                                       | C <sub>22</sub> H <sub>44</sub> O <sub>2</sub>                                  | No                                        | 340.3341                  | 340.3335               | -1.7                                                      | na                                               |
| 22:1                                                 | 22:1                | D                                       | C <sub>22</sub> H <sub>42</sub> O <sub>2</sub>                                  | No                                        | 338.3185                  | 338.3193               | 2.4                                                       | na                                               |
| 22:2                                                 | 22:2                | D                                       | C <sub>22</sub> H <sub>40</sub> O <sub>2</sub>                                  | No                                        | 336.3028                  | 336.3031               | 1.0                                                       | na                                               |
